# Supplementary material for: Sini Decoction Improves Adrenal Function and the Short-Term Outcome of Septic Rats through Downregulation of Adrenal Toll-Like Receptor 4 Expression
Source: Evid Based Complement Alternat Med. 2018 Jun 19;2018:5186158. doi: 10.1155/2018/5186158 (PMC6029449; doi:10.1155/2018/5186158)
Supplement: Supplementary Materials — Chemical profiling of main constituents in SND, using ultrahigh pressure liquid chromatography coupled with LTQ Orbitrap mass spectrometry. 17 main constituents were profiled by comparing the mass information with those reported in literatures [32, 33]. [file 5186158.f1.zip]

Archive with 2 entries (2 files):
- supplementary material_ECAM_2350748.docx
- supplementary material_ECAM_2350749.pdf
